# Supplementary material
Source: publisher figshare collection journal article supplement (https://geolsoc.figshare.com/articles/dataset/_/14095853)
Supplement: Supplementary file 1 [file 1]

## Sheet: All data
Lafarge Beaujolais
sample ID	Preservation	Composite height (m)	CaCO3 (wt.%)	TOC carb. free IRMS (wt.%)	SD	TOC (wt.%) IRMS	δ13CTOC (‰VPDB)	SD	δ13Ccarb (‰VPDB)	δ18Ocarb (‰VPDB)	87Sr/86Sr	year of collection	Source
PL-2013-1	Non-weathered	0.28	1.13912	14.4577	0.0643467	14.293	-31.6664	0.0521565				2013	This study
PL-2013-2	Non-weathered	0.3	1.17574	13.6288	0.557907	13.4686	-32.0468	0.0454959				2013	This study
DV01-2	Non-weathered	0.42	0.322104	12.6335		12.5928	-31.4004	0.00641331				2013	This study
DV02-2	Non-weathered	0.44	78.5689	9.99686		2.14244	-30.35		-2.53552	-4.74918		2013	This study
DV03-2	Non-weathered	0.46	69.3374	8.94082		2.74149	-30.88		0.0674231	-3.44014		2013	This study
DV04-2	Non-weathered	0.48	57.6869	10.8951		4.61006	-30.3		-1.08301	-4.04365		2013	This study
DV05-2	Non-weathered	0.51	79.2637	10.886		2.25735	-29.94		1.05511	-2.5621		2013	This study
DV06-2	Non-weathered	0.57	57.7226	10.2679	0.417069	4.34102	-30.0649	0.0284418	-0.894392	-3.34756		2013	This study
DV07-2	Non-weathered	0.61	11.2595	14.7811		13.1168	-29.59		-1.44043	-5.51093		2013	This study
DV08-2	Non-weathered	0.64	15.4707	13.6536		11.5413	-29.86		-0.812395	-5.69758		2013	This study
DV09-2	Non-weathered	0.69	24.7402	13.8293		10.4079	-30.14		-0.898142	-5.17878		2013	This study
DV10-2	Non-weathered	0.75	1.29206	10.2063		10.0745	-31.4					2013	This study
DV11-2	Non-weathered	0.81	26.6451	9.22216		6.76491	-29.93		-0.495425	-5.12808		2013	This study
DV12-2	Non-weathered	0.85	27.815	12.555	0.276492	9.0628	-29.7329	0.0255114	-0.824844	-5.46828		2013	This study
DV13-2	Non-weathered	0.92	54.4333	16.9164		7.70825	-29.66		-0.605292	-5.04221		2013	This study
DV14-2	Non-weathered	0.96	89.7288	15.6762		1.61014	-29.66		0.963659	-2.90073		2013	This study
L 03	Non-weathered	2.9	27.3688	3.41525		2.48054	-28.387		-0.418433	-5.09825		2009	Suan et al. (2013)
L 04	Non-weathered	3	28.9991	3.07945		2.18644	-28.929		-0.703759	-4.98482		2009	Suan et al. (2013)
L 05	Non-weathered	3.1	31.7506	2.89361		1.97487	-28.801		0.301876	-5.13728		2009	Suan et al. (2013)
L 06	Non-weathered	3.2	32.2055	9.55857		6.48018	-28.848		0.475145	-5.09695		2009	Suan et al. (2013)
L 07	Non-weathered	3.4	43.6777	9.6742		5.44873	-28.983		0.143363	-4.76069		2009	Suan et al. (2013)
L 08	Non-weathered	3.5	35.0597						0.212332	-5.00968		2009	Suan et al. (2013)
L 09	Non-weathered	3.6	35.9042	9.43655		6.04844	-29.088		-0.15383	-4.82834		2009	Suan et al. (2013)
BB2-NW	Non-weathered	3.65	31	8.87997		6.12718	-28.8					2010	Suan et al. (2013)
L 10	Non-weathered	3.7	39.3684	10.3283		6.26222	-28.951		-0.423433	-4.82153		2009	Suan et al. (2013)
MA-2013NW	Non-weathered	3.75	50.9377	9.51918		4.67032	-28.5089					2013	This study
L 11	Non-weathered	3.8	53.1332	10.4083		4.87806	-28.681		-0.417433	-4.57924		2009	Suan et al. (2013)
L 12	Non-weathered	3.9	37.2676	10.4828		6.57611	-28.538		-2.35616	-5.50408		2009	Suan et al. (2013)
L 13	Non-weathered	4	30.3352						-1.62865	-5.01008		2009	Suan et al. (2013)
L 14	Non-weathered	4.1	26.057	12.1807		9.00676	-28.31		0.116274	-5.11056		2009	Suan et al. (2013)
L 15	Non-weathered	4.2	28.1971						0.225375	-5.18242		2009	Suan et al. (2013)
L 16	Non-weathered	4.3	29.1706	10.2517		7.26123	-28.433		0.0669733	-5.04701		2009	Suan et al. (2013)
L 18	Non-weathered	4.5	29.7462	9.73709		6.84068	-28.221		-0.569135	-5.01869		2009	Suan et al. (2013)
L 19	Non-weathered	4.6	26.4705	9.55064		7.02254	-28.617		-0.815239	-5.14479		2009	Suan et al. (2013)
UAB-NW	Non-weathered	5.25	22	6.16873		4.81161	-28.2					2010	Suan et al. (2013)
CHI-01	Weathered	0	60.4312						-3.07977	-4.97461		2011	This study
CHI-02	Weathered	0.06	68.5595						-2.95439	-5.10311		2011	This study
CHI-03	Weathered	0.11	58.5257						-2.05223	-4.74884		2011	This study
CHI-04	Weathered	0.16	4.74141						-2.98326	-7.11094		2011	This study
CHI-05	Weathered	0.2	4.26048						-3.15402	-9.2488		2011	This study
CHI-06	Weathered	0.23	17.9251						-4.31521	-6.93637		2011	This study
CHI-07	Weathered	0.26	8.93267						-4.05285	-6.41664		2011	This study
CHI-08	Weathered	0.3	28.6						-5.4459	-5.29647		2011	This study
CHI-09	Weathered	0.35	14.8334						-3.28339	-5.79102		2011	This study
CHI-10	Weathered	0.4	26.2359						-4.53931	-5.76679		2011	This study
CHI-11	Weathered	0.47	73.1216						-3.31472	-4.33944		2011	This study
CHI-12	Weathered	0.53	75.4886						-1.97359	-4.88764		2011	This study
CHI-13	Weathered	0.62	8.18543						-2.19129	-9.42334		2011	This study
CHI-14	Weathered	0.7	12.3726						-2.09027	-5.50033		2011	This study
CHI-15	Weathered	0.78	12.5828						-1.46289	-6.09573		2011	This study
CHI-16	Weathered	0.84	69.5539						-2.60001	-4.36307		2011	This study
CHI-17	Weathered	0.92	93.6037						-3.00001	-4.36708		2011	This study
CHI-18	Weathered	1.1	86.8416						-1.87758	-3.33658		2011	This study
CHI-19	Weathered	1.3	89.5302						-3.01854	-4.16002		2011	This study
CHI-20	Weathered	1.4	27.0869						-1.86529	-4.57232		2011	This study
CHI-21	Weathered	1.54	84.6296						-1.14699	-3.22794		2011	This study
CHI-22	Weathered	1.68	29.1131						-1.80416	-5.53197		2011	This study
CHI-23	Weathered	1.77	82.4147						-1.21219	-3.11294		2011	This study
BB2-W	Weathered	3.65	28	0.138419		0.0996615	-24.8					2010	Suan et al. (2013)
UAB-W	Weathered	5.25	22	0.256524		0.200088	-25.4					2010	Suan et al. (2013)
LI 01	Weathered	0.02	79.8944	0.232803		0.0468064	-25.514		-0.17683	-4.9035		2009	Suan et al. (2013)
LI 02	Weathered	0.53	72.9322	0.286149		0.0774544	-28.197		-3.60388	-3.88579		2009	Suan et al. (2013)
LI 04	Weathered	0.88	78.4253	0.378073		0.081568	-29.546		-2.82647	-4.00449		2009	Suan et al. (2013)
LI 05	Weathered	1.2	84.2654						0.961085	-2.5044		2009	This study
LI 06	Weathered	1.62	83.9643	1.84377		0.295662	-27.5		-1.49055	-3.27161		2009	Suan et al. (2013)
LI 07	Weathered	1.98	90.8424						-1.18654	-3.08496		2009	Suan et al. (2013)
LI 08	Weathered	2.11	85.2292						-1.24854	-4.48076		2009	Suan et al. (2013)
LI 09	Weathered	2.26	89.4457	0.774278		0.0817198	-27.017		-0.797238	-2.39731		2009	Suan et al. (2013)
LI 10	Weathered	2.61	93.1215	1.18513		0.081519	-27.091		-1.84515	-2.23238		2009	Suan et al. (2013)
Nodule 2012	Weathered								-3.8847	-4.17786		2012	This study
CH11-224	Belemnite	0.02									0.707101	2011	This study
Ch09-023	Belemnite	1.83									0.707195	2009	This study
CH09-003	Belemnite	3.64									0.707191	2009	This study
BLH 01	Belemnite	5.61									0.707223	2011	This study
BLH 13	Belemnite	7.85									0.707227	2011	This study
